# Supplementary material for: Adult-born neurons immature during learning are necessary for remote memory reconsolidation in rats
Source: PubMed Central journal article supplement (PMC7979763; doi:10.1038/s41467-021-22069-4), 2021-03-19
Supplement: 41467_2021_22069_MOESM1_ESM.pdf [file 41467_2021_22069_MOESM1_ESM.pdf]

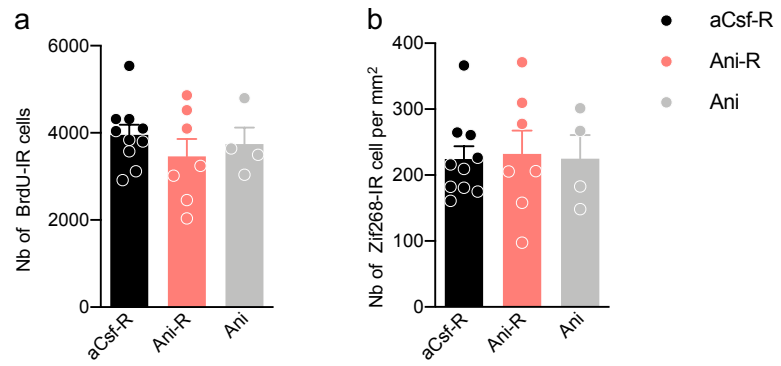

**Fig S1. a)** Number of BrdU-IR cells in the Dentate Gyrus (DG): the number of BrdU-IR cells was similar between the trained groups (aCsf-R, n=10, Ani-R, n=7, Ani, n=4). **b)** Zif268 expression in the whole DG. The DG activation was similar among the trained groups. All data shown are mean  $\pm$  s.e.m. For statistical details, see table S1.

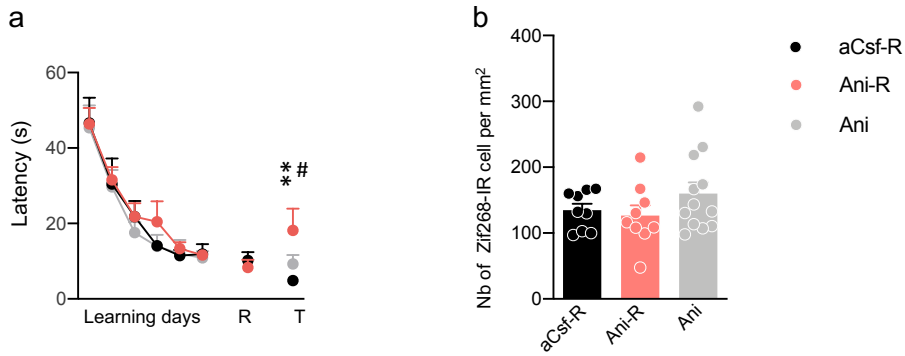

**Fig S2. Blocking protein synthesis after spatial memory reactivation impairs remote memory reconsolidation. a)** Latency to find the platform during training and to first cross the position of the platform during the reactivation and test trials. Memory performances of Ani-R (n=12) rats were impaired compared to those of aCsf-R (n=12) rats during the test (T) (Tukey's test #  $p=0.043$ ) and compared to their performances at the reactivation trial (R) (Tukey's test  $**p<0.01$ ). **b)** Zif268 expression in the whole Dentate Gyrus (DG). The DG activation was similar among the trained groups (aCsf-R n=9, Ani-R n=9, Ani n=12). All data shown are mean  $\pm$  s.e.m. For statistical details, see table S1.

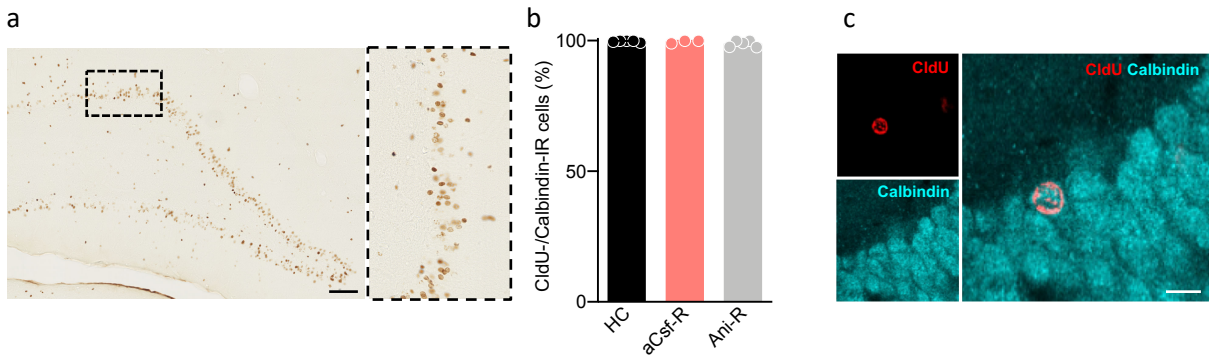

**Fig S3: Phenotype of developmentally-generated cells.** **a)** Illustration of CldU-IR cells in the dentate gyrus : Example shown is a representative of a total of >240 dentate gyrus from 30 rats (scale bar 100 $\mu$ m) **b)** Percentage of CldU-IR cells expressing Calbindin (HC: 99.2  $\pm$  0.15, n=5; aCsf-R: 99.7  $\pm$  0.33, n=3; Ani-R: 98.8  $\pm$  0.55, n=5). There was no difference between groups. **c)** Confocal illustration showing CldU-IR cells (red) coexpressing the neuronal marker Calbindin (blue). All data shown are mean  $\pm$  s.e.m. Bar scale 10  $\mu$ m.

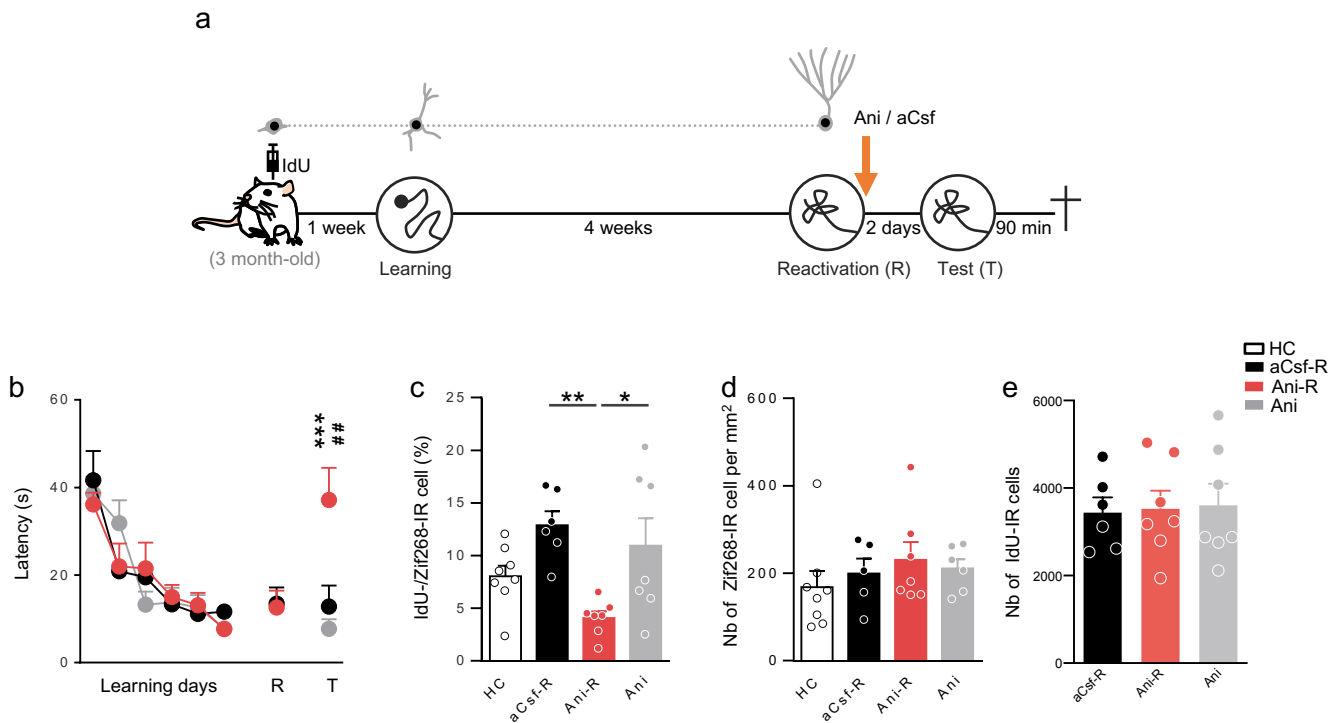

**Fig S4. The effect of blocking memory reconsolidation on adult-born neurons retrieval-induced activation does not depend on the age of the animal. a)** Experimental protocol: 3 month-old rats were injected with IdU one week before MWM training. Rats were trained for 6 days and memory was reactivated 4 weeks later. Immediately after reactivation rats were injected (icv) with anisomycin (Ani-R, n=7) or with aCsf (aCsf-R, n=6). A group of rats received anisomycin but without the reactivation session (Ani, n=7). Memory was tested 2 days later and rats were sacrificed 90 min after the test. **b)** Latency to find the platform during training and to first cross the position of the platform during the reactivation and test trials. Memory performances of Ani-R rats were impaired compared to those of aCsf-R rat during the test (Tukey's test ## $p < 0.01$ ) and compared to their performances at the reactivation trial (Tukey's test \*\*\* $p < 0.001$ ). **c)** Zif268 expression in IdU-IR cells. Percentage of expression was higher in the aCsf-R group compared to that of control home cage (HC) rats (n=8) and to that of Ani-R rats (Tukey's test \* $p < 0.05$ , \*\* $p < 0.01$ ) but not different than that of Ani rats. **d)** Zif268 expression in the whole Dentate Gyrus (DG). The DG activation was similar between groups. **e)** Number of IdU-IR cells in the DG. The number of IdU-IR cells was similar between groups. All data shown are mean  $\pm$  s.e.m. For statistical details, see table S1.

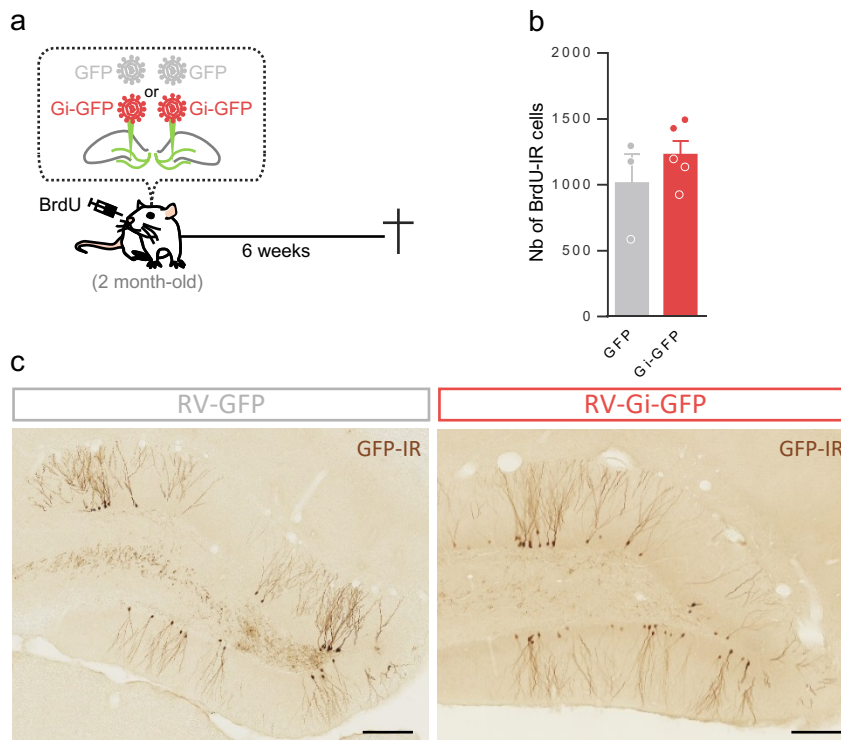

**Fig S5. RV infusions do not impact adult neurogenesis.** **a)** Experimental protocol: Two-month old rats were injected with BrdU and injected bilaterally into the DG with the retrovirus GFP-Gi (n=5) or with its control, the GFP-RV (n=3). Six weeks later they were sacrificed. **b)** Adult-born neurons survival. There was no difference between groups (Two-tailed T-test  $t_6=1.028$ ,  $p=0.3437$ ). **c)** Illustration of RV-labelled cells in the DG. Example shown is a representative of a total of >64 dentate gyrus from 8 rats (scale=100 $\mu$ m). For statistical details, see table S1.

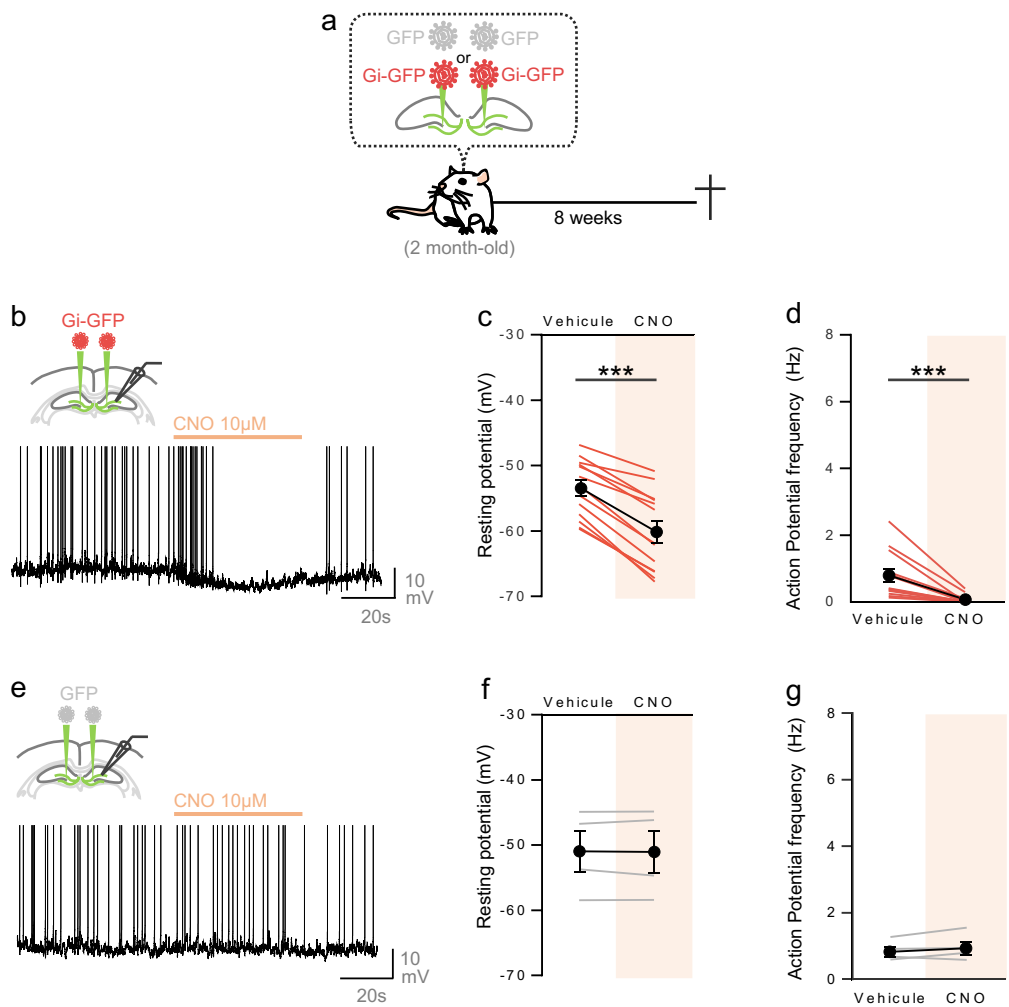

**Fig S6. CNO application ex vivo quickly and reversibly inhibits Gi-GFP-RV transduced cells activity whereas it has no effect on the GFP-RV transduced cells.** **a)** Experimental protocol: Two-month old rats were injected bilaterally into the DG with the retrovirus Gi-GFP (n=4 rats, n=13 cells) or with its control, the GFP-RV (n=3 rats, n=4 cells). 8 weeks later they were sacrificed. **b)** Representative trace showing the inhibitory effect of CNO 10µM perfusion onto Gi-GFP RV infected cells. **c)** CNO hyperpolarizes Gi-GFP RV infected cells (Two-tailed T-test,  $t_{12}=10.66$ ,  $***p<0.001$ ). **d)** CNO drastically reduces Gi-GFP RV transduced cells action potential firing frequency (Two-tailed T-test,  $t_{12}=4.416$ ,  $***p=0.0008$ ). **e)** Representative trace showing the absence of effect of CNO 10µM perfusion onto GFP RV infected cells. **f)** and **g)** CNO has no effect on GFP RV transduced cells activity (Two-tailed T-test,  $t_3=0.2623$   $p=0.8101$  and Two-tailed T-test,  $t_3=1.219$   $p=0.31$ ). All data shown are mean  $\pm$  s.e.m. For statistical details, see table S1.

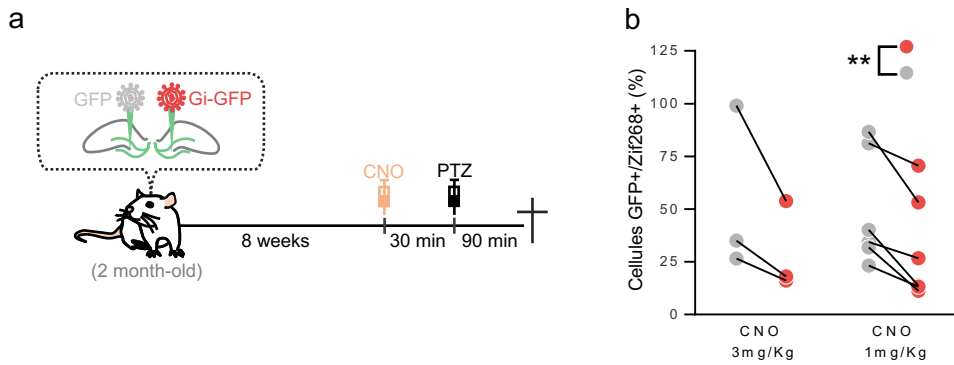

**Fig S7. CNO injection in vivo inhibits Gi-GFP RV transduced cells activity compared to GFP RV transduced cells activity.** **a)** Experimental protocol: Two-month old rats were injected into the right DG with the retrovirus Gi-GFP and with its control, the GFP RV into the left DG. 8 weeks later, one group received a 3mg/Kg CNO ip injection (n=3) and another group a 1mg/Kg CNO ip injection (n=6). 30 min later, both groups were injected with a PTZ i.p injection. The rats were sacrificed 90 min later. **b)** Zif268 expression in GFP-IR cells. In both groups, percentage of expression was lower in the Gi-GFP cells compared to that of GFP cells (Tukey's test  $**p < 0.01$ ). For statistical details, see table S1.

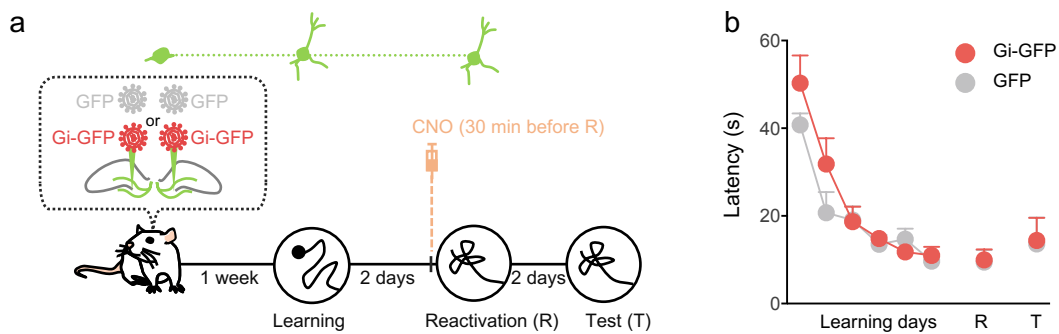

**Fig S8. The effect of silencing immature adult-born neurons on recent memory reconsolidation. a)** Experimental protocol: 2 month-old rats were injected with Gi-GFP RV (n=9) or its control GFP RV (n=8) one week before MWM training. Rats were trained for 6 days and memory was reactivated 2 days later. Thirty minutes before reactivation, CNO (1mg/Kg) was injected (i.p). Memory was tested 2 days later (Test). **b)** Latency to find the platform during training and to first cross the position of the platform during the test. There was no difference between groups. All data shown are mean  $\pm$  s.e.m. For statistical details, see table S1.



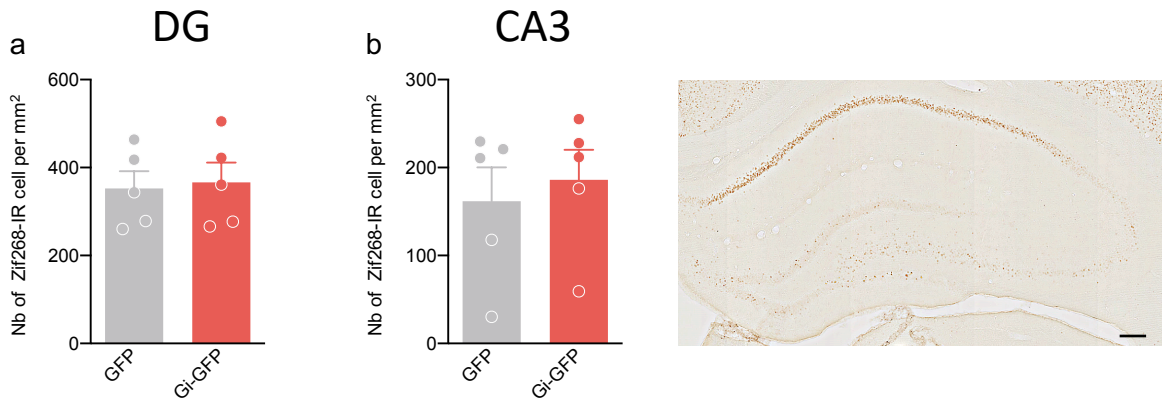

**Fig S9. Silencing during reconsolidation, neurons that were immature at the time of learning, has no effect on global DG and CA3 activation.** Zif268 expression in the whole Dentate Gyrus (DG) and CA3. The activation was similar among the trained groups (GFP n=5, Gi-GFP n=5 rats) both in **a**) DG (Two-tailed T-test,  $t_8=0.2269$   $p=0.8262$ ) and **b**) CA3 (Two-tailed T-test,  $t_8=0.4719$   $p=0.6496$ ). Illustration of Zif268-IR cells in the hippocampus. Bar scale 10 $\mu$ m. All data shown are mean  $\pm$  s.e.m. For statistical details, see table S1.

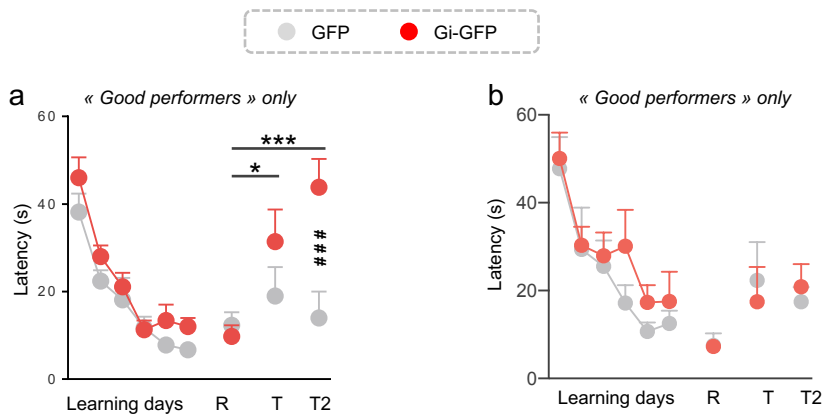

**Fig S10. In good performers, silencing during reconsolidation, neurons that were immature at the time of learning, impairs long-term memory persistence whereas silencing neurons that were mature at the time of learning had no impact on memory. a)** Latency to find the platform during training and to first cross the position of the platform during the reactivation and test trials only for the rats showing a good retention during the reactivation (less than 30sec to reach the platform position). Memory performances of Gi-GFP rats (n=8) were impaired compared to their performances at the reactivation trial as soon as the first test session (Tukey's test: \*p<0.05, \*\*\*p<0.001). Memory performances of Gi-GFP rats were impaired compared to those of GFP rats (n=8) at Test 2 (Tukey's test: ###p<0.001). **b)** Latency to find the platform during training and to first cross the position of the platform during the reactivation and test trials only for the rats showing a good retention during reactivation (less than 30sec to reach the platform position). Memory performances of Gi-GFP (n=9) rats and GFP (n=6) rats were similar. All data shown are mean  $\pm$  s.e.m. For statistical details, see table S1.

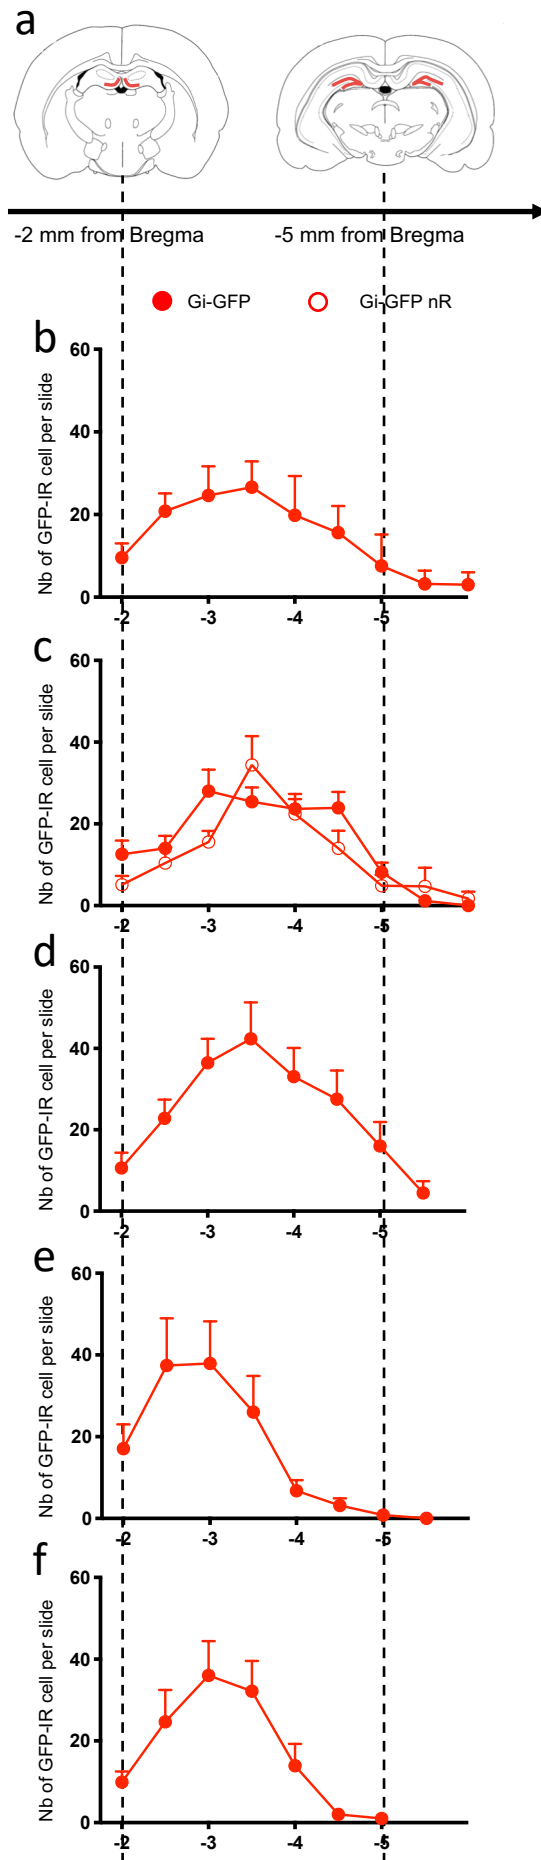

**Fig S11. Septo temporal distribution of Gi-GFP labelled cells.** a) Illustration of the rat brain according to the Paxinos Atlas. In red: dentate gyrus. Number of Gi-GFP-IR cells along the septo temporal axis in **b**) experiment on Fig 4 (n=5 rats), **c**) experiment on Fig 5a (n=11 rats), **d**) experiment on Fig 5d (n=11 rats), **e**) experiment on Fig 6 (n=12 rats). **f**) experiment on Fig 7 (n=12 rats). All data shown are mean  $\pm$  s.e.m.

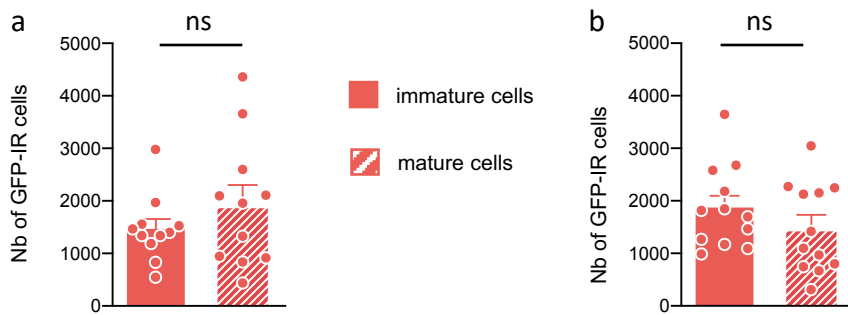

**Fig S12. Number of transduced cells with the Gi-GFP retrovirus. a)** The number of cells transduced with the Gi-GFP RV one week before learning in Fig 5a (called here immature cells, n=11 rats) was similar to the number of cells transduced with the Gi-GFP RV six weeks before learning in Fig 5b (here called mature cells, n=11 rats) (Two-tailed T-test,  $t_{20}=1.116$   $p=0.2778$ ). **b)** The number of cells transduced with the Gi-GFP RV one week before learning in Fig 6 (immature cell, n=12 rats) was similar to the number of cells transduced with the Gi-GFP RV six weeks before learning in Fig 7 (mature cells, n=12 rats) (Two-tailed T-test,  $t_{22}=1.139$   $p=0.2671$ ). All data shown are mean  $\pm$  s.e.m. For statistical details, see table S1.

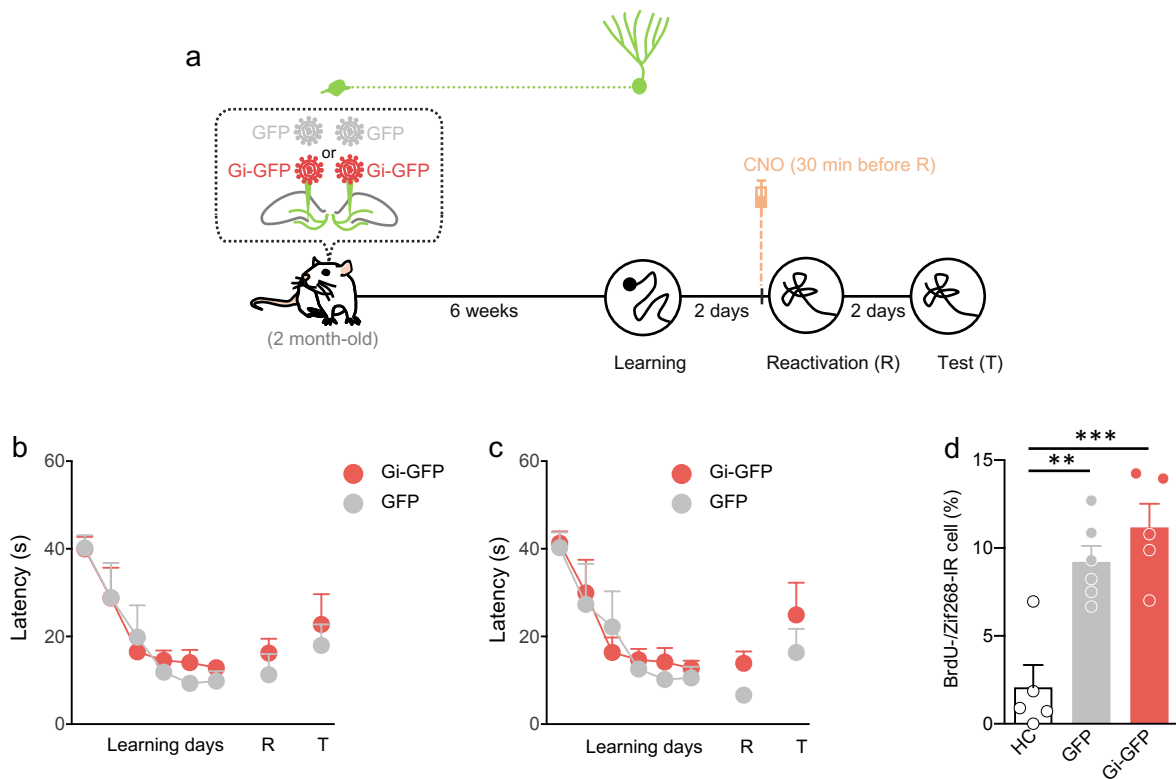

**Fig S13. Silencing during recent reconsolidation, neurons that were 6 weeks old at the time of learning, has no impact on memory.** **a)** Experimental protocol: 2 month-old rats were injected with Gi-GFP RV ( $n=10$ ) or its control GFP RV ( $n=7$ ) six week before MWM training. Rats were trained for 6 days and memory was reactivated 2 days later. 30 minutes before reactivation, rats were injected (i.p) with 1mg/Kg CNO. Memory was tested 2 days later (Test). **b)** Latency to find the platform during training and to first cross the position of the platform during the reactivation and test trial. Memory performances of Gi-GFP rats and GFP rats are similar. **c)** Latency to find the platform during training and to first cross the position of the platform during the reactivation and test trial only for the rats showing a good retention during reactivation (less than 30sec to reach the platform position). Memory performances of Gi-GFP ( $n=9$ ) rats and GFP ( $n=6$ ) rats are similar. **d)** Zif268 expression in BrdU-IR cells. Percentage of expression was higher in both the Gi and the GFP rats compared to that of control HC rats ( $n=5$ ) (Tukey's test:  $***p<0.001$ ;  $**p<0.01$ ). All data shown are mean  $\pm$  s.e.m. For statistical details, see table S1.

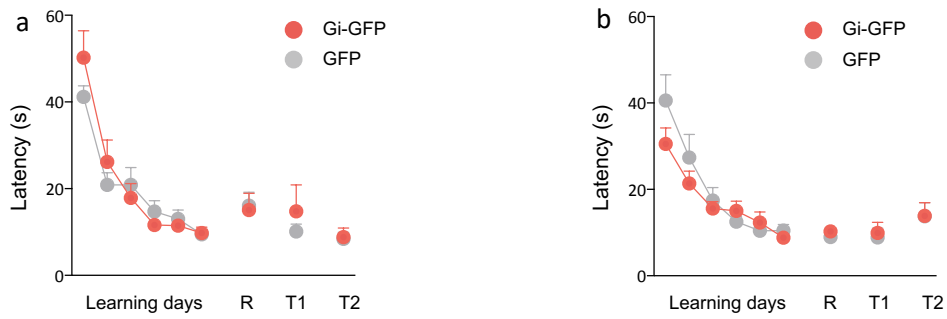

**Fig S14. Effect of silencing adult-born neurons on latency to find the platform when memory is updated. a)** There was no effect of silencing immature adult-born neurons on the latency to cross the platform at retrieval tests (Gi-GFP n=12 rats, GFP, n=12 rats). **b)** There was no effect of silencing mature adult-born neurons on the latency to cross the platform at retrieval tests (Gi-GFP n=12 rats, GFP, n=11 rats). All data shown are mean  $\pm$  s.e.m. For statistical details, see table S1.

| Figure                      | Panel                                           | Statistical test                     | effects                                                 | statistic          | p-value |
|-----------------------------|-------------------------------------------------|--------------------------------------|---------------------------------------------------------|--------------------|---------|
| <b>Fig.1</b>                | <b>b</b><br>(D6-React-Test1)<br>aCsf vs Ani     | Two-way ANOVA<br>(repeated measures) | No effect of group                                      | F(1,15)=4.23       | 0.058   |
|                             |                                                 |                                      | Significant effect of time                              | F(2,30)=19.72      | <0.0001 |
|                             |                                                 |                                      | Significant group x time interaction (Sidak and Turkey) | F(2,30)=6.92       | 0.003   |
|                             | <b>c</b>                                        | One-way ANOVA                        |                                                         | F(2,18)=5.15       | 0.0169  |
|                             | <b>d</b>                                        | One-way ANOVA                        |                                                         | F(3,22)=7.048      | 0,0017  |
| <b>Fig.2</b>                | <b>b</b>                                        | One-way ANOVA                        |                                                         | F(3,39)=10.98      | <0.0001 |
|                             | <b>d</b>                                        |                                      |                                                         | F(3,39)=0.9469     | 0.4274  |
| <b>Fig 3</b>                | <b>b</b><br>(d6-T)                              | Two-way ANOVA<br>(repeated measures) | Significant effect of group                             | F(3,30)=3.201      | 0.0373  |
|                             |                                                 |                                      | Significant effect of time                              | F(1,30)=5.080      | 0.0317  |
|                             |                                                 |                                      | Significant group x time interaction (Sidak and Turkey) | F(3,30)=3.022      | 0.0450  |
|                             | <b>d</b><br>(d6-T)                              | Two-way ANOVA<br>(repeated measures) | No effect of group                                      | F(1,15)=0.2        | 0.6551  |
|                             |                                                 |                                      | No effect of time                                       | F(1,15)=0.5        | 0.4549  |
|                             |                                                 |                                      | No group x time interaction                             | F(1,15)=0.4        | 0.5313  |
| <b>e</b>                    | Unpaired T-test                                 |                                      | T(9)=1.604                                              | 0.1433             |         |
| <b>f</b>                    | Unpaired T-test                                 |                                      | T(9)=3.831                                              | 0.0040             |         |
| <b>Fig 4</b>                | <b>b</b><br>(D6-React-Test) GFP vs Gi-GFP       | Two-way ANOVA<br>(repeated measures) | Significant effect of group                             | F(1,12)=7.75       | 0.0165  |
|                             |                                                 |                                      | no effect of time                                       | F(2,24)=2.822      | 0.0793  |
|                             |                                                 |                                      | Significant group x time interaction (Sidak and Turkey) | F(2,24)=3.796      | 0.0369  |
|                             | <b>c</b>                                        | One-way ANOVA                        |                                                         | F(2,12)=39.46      | <0.0001 |
|                             | <b>d</b>                                        | One-way ANOVA                        |                                                         | F(2,12)=6.718      | 0.0110  |
|                             | <b>f</b>                                        | One-way ANOVA                        |                                                         | F(2,12)=35.19      | <0.0001 |
| <b>Fig.5</b>                | <b>b</b><br>(D6-React-Test1&2)<br>GFP vs Gi-GFP | Two-way ANOVA<br>(repeated measures) | No effect of group                                      | F (1, 19) = 2.520  | 0.1289  |
|                             |                                                 |                                      | Significant effect of time                              | F (3, 57) = 7.348  | 0.0003  |
|                             |                                                 |                                      | Significant group x time interaction                    | F (3, 57) = 2.835  | 0.0461  |
|                             | <b>c</b>                                        | One-way ANOVA                        |                                                         | F (2, 28) = 4.840  | 0.0157  |
|                             | <b>e</b><br>(D6-React-Test1&2)                  | Two-way ANOVA<br>(repeated measures) | No effect of group                                      | F (1, 15) = 0.1687 | 0.6870  |
|                             |                                                 |                                      | No effect of time                                       | F (3, 45) = 0.8603 | 0.4686  |
| No group x time interaction |                                                 |                                      | F(3,45)=0.5796                                          | 0.6314             |         |

|              |          |                                        |                                                            |                                                         |                |        |
|--------------|----------|----------------------------------------|------------------------------------------------------------|---------------------------------------------------------|----------------|--------|
| <b>Fig.6</b> | <b>b</b> | Three-way ANOVA<br>(repeated measures) | Significant effect of time                                 | F(2,44)=7.0272                                          | 0.0022         |        |
|              |          |                                        | Significant group x time interaction                       | F(2,44)=3.7816                                          | 0.0305         |        |
|              |          |                                        | Significant effect of zone                                 | F(1,22)=29.2115                                         | <0.0001        |        |
|              |          |                                        | No group x zone interaction                                | F(1,22)=2.6418                                          | 0.1183         |        |
|              |          |                                        | Significant time x zone interaction                        | F(2,44)=7.1315                                          | 0.0021         |        |
|              |          |                                        | Significant time x zone x group interaction (Newman-Keuls) | F(2,44)=3.7925                                          | 0.0302         |        |
|              | <b>c</b> | Three-way ANOVA<br>(repeated measures) | No effect of group                                         | F(1,22)=0.4351                                          | 0.5163         |        |
|              |          |                                        | Significant effect of time                                 | F(2,44)=4.7199                                          | 0.0139         |        |
|              |          |                                        | Significant group x time interaction                       | F(2,44)=2.5563                                          | 0.0890         |        |
|              |          |                                        | Significant effect of zone                                 | F(1,22)=26.7146                                         | <0.0001        |        |
|              |          |                                        | No group x zone interaction                                | F(1,22)=1.5164                                          | 0.2312         |        |
|              |          |                                        | Significant time x zone interaction                        | F(2,44)=5.7216                                          | 0.2312         |        |
|              | <b>f</b> | Two-way ANOVA<br>(repeated measures)   | No effect of group                                         | F(1,22)=0.3720                                          | 0.5481         |        |
|              |          |                                        | Significant effect of time                                 | F(2,44)=5.375                                           | 0.0082         |        |
|              |          |                                        | Significant group x time interaction (Sidak and Turkey)    | F(2,44)=3.517                                           | 0.0383         |        |
|              |          |                                        | <b>g</b>                                                   | No effect of group                                      | F(1,22)=0.5051 | 0.4847 |
|              |          |                                        |                                                            | No effect of time                                       | F(2,44)=2.279  | 0.1143 |
|              |          |                                        |                                                            | Significant group x time interaction (Sidak and Turkey) | F(2,44)=4.170  | 0.0220 |
| <b>Fig.7</b> | <b>b</b> | Three-way ANOVA<br>(repeated measures) | No effect of group                                         | F(1,18)=0.2600                                          | 0.6163         |        |
|              |          |                                        | Significant effect of time                                 | F(2,36)=7.4450                                          | 0.0019         |        |
|              |          |                                        | No group x time interaction                                | F(2,36)=0.3891                                          | 0.6805         |        |
|              |          |                                        | Significant effect of zone                                 | F(1,18)=36.8225                                         | <0.0001        |        |
|              |          |                                        | No group x zone interaction                                | F(1,18)=0.4405                                          | 0.5153         |        |
|              |          |                                        | Significant time x zone interaction (Newman-Keuls)         | F(2,36)=8.9414                                          | 0.0007         |        |
|              |          |                                        | No time x zone x group interaction                         | F(2,36)=0.1693                                          | 0.8449         |        |



|                             |                                            |                                        |                                                         |                 |         |
|-----------------------------|--------------------------------------------|----------------------------------------|---------------------------------------------------------|-----------------|---------|
|                             | <b>c</b>                                   | Three-way ANOVA<br>(repeated measures) | No effect of group                                      | F(1,18)=0.4945  | 0.4909  |
|                             |                                            |                                        | Significant effect of time                              | F(2,36)=5.2411  | 0.0100  |
|                             |                                            |                                        | No group x time interaction                             | F(2,36)=0.3267  | 0.7234  |
|                             |                                            |                                        | Significant effect of zone                              | F(1,18)=37.9301 | <0.0001 |
|                             |                                            |                                        | No group x zone interaction                             | F(1,18)=1.4589  | 0.2427  |
|                             |                                            |                                        | Significant time x zone interaction (Newman-Keuls)      | F(2,36)=9.9318  | 0.0004  |
|                             |                                            |                                        | No time x zone x group interaction                      | F(2,36)=0.2028  | 0.8117  |
|                             | <b>e</b>                                   | Two-way ANOVA<br>(repeated measures)   | No effect of group                                      | F(1,18)=0.06305 | 0.8046  |
|                             |                                            |                                        | Significant effect of time (Turkey)                     | F(2,36)=10.90   | 0.0002  |
|                             |                                            |                                        | No group x time interaction                             | F(2,36)=0.7099  | 0.4984  |
|                             | <b>f</b>                                   | Two-way ANOVA<br>(repeated measures)   | No effect of group                                      | F(1,18)=0.06249 | 0.8054  |
|                             |                                            |                                        | Significant effect of time (Turkey)                     | F(2,36)=6.734   | 0.0033  |
| No group x time interaction |                                            |                                        | F(2,36)=1.501                                           | 0.2365          |         |
| <b>Fig.S1</b>               | <b>a</b>                                   | One-way ANOVA                          |                                                         | F(2,18)=0.6892  | 0.5117  |
|                             | <b>b</b>                                   | One-way ANOVA                          |                                                         | F(2,18)=0.02511 | 0.9752  |
| <b>Fig.S2</b>               | <b>a</b><br>(D6-React-Test)<br>aCsf vs Ani | Two-way ANOVA<br>(repeated measures)   | No effect of group                                      | F(1,22)=2.010   | 0.1703  |
|                             |                                            |                                        | No effect of time                                       | F(2,44)=1.4823  | 0.6206  |
|                             |                                            |                                        | Significant group x time interaction (Sidak and Turkey) | F(2,44)=4.459   | 0.0173  |
|                             | <b>b</b>                                   | One-way ANOVA                          |                                                         | F(2,27) = 1.369 | 0.2714  |
| <b>Fig.S3</b>               | <b>b</b>                                   | One-way ANOVA                          |                                                         | F(2,10)=1.699   | 0.2316  |
| <b>Fig.S4</b>               | <b>b</b><br>(D6-React-Test)<br>aCsf vs Ani | Two-way ANOVA<br>(repeated measures)   | No effect of group                                      | F(1,11) = 2.546 | 0.1389  |
|                             |                                            |                                        | Significant effect of time                              | F(2,22) = 7.908 | 0.0026  |
|                             |                                            |                                        | Significant group x time interaction (Sidak and Turkey) | F(2,22) = 7.373 | 0.0035  |
|                             | <b>c</b>                                   | One-way ANOVA                          |                                                         | F(3,24) = 5.700 | 0.0043  |
|                             | <b>d</b>                                   | One-way ANOVA                          |                                                         | F(3,24) = 1.99  | 0.14    |
| <b>e</b>                    | One-way ANOVA                              |                                        | F(3,17) = 0.0374                                        | 0.9634          |         |
| <b>Fig.S5</b>               | <b>b</b>                                   | T-test                                 |                                                         | T(6)=1.028      | 0.3437  |
| <b>Fig.S6</b>               | <b>c</b>                                   | Paired T-test                          |                                                         | T(12)=10.66     | <0.0001 |
|                             | <b>d</b>                                   |                                        |                                                         | T(12)=4.416     | 0.0008  |
|                             | <b>f</b>                                   |                                        |                                                         | T(3)=0.2623     | 0.8101  |

|                |                                                          |                                         |                                                            |                   |        |
|----------------|----------------------------------------------------------|-----------------------------------------|------------------------------------------------------------|-------------------|--------|
|                | <b>g</b>                                                 |                                         |                                                            | T(3)=1.219        | 0.3100 |
| <b>Fig S7</b>  | <b>b</b>                                                 | Two-way ANOVA<br>(repeated<br>measures) | No effect of CNO dose                                      | F (1, 7) = 0.0024 | 0.9617 |
|                |                                                          |                                         | Significant effect of RV                                   | F (1, 7) = 20.45  | 0.0027 |
|                |                                                          |                                         | No CNO dose x RV<br>interaction                            | F (1, 7) = 0.4116 | 0.5416 |
| <b>Fig S8</b>  | <b>b</b><br>(D6-React-<br>Test) GFP vs<br>Gi-GFP         | Two-way ANOVA<br>(repeated<br>measures) | No effect of group                                         | F(1,15)=0.04246   | 0.8395 |
|                |                                                          |                                         | No effect of time                                          | F(2,30)=1.424     | 0.2566 |
|                |                                                          |                                         | No group x time interaction                                | F(2,30)=0.0097    | 0.9903 |
| <b>Fig S9</b>  | <b>a</b>                                                 | Unpaired T-test                         |                                                            | T(8)=0.2269       | 0.8262 |
|                | <b>b</b>                                                 | Unpaired T-test                         |                                                            | T(8)=0.4719       | 0.6496 |
| <b>Fig S10</b> | <b>a</b><br>(D6-React-<br>Test1&2)                       | Two-way ANOVA<br>(repeated<br>measures) | Significant effect of group                                | F (1, 14) = 14.16 | 0.0021 |
|                |                                                          |                                         | Significant effect of time                                 | F (3, 42) = 7.350 | 0.0005 |
|                |                                                          |                                         | Significant group x time<br>interaction (Sidak and Turkey) | F (3, 42) = 3.621 | 0.0206 |
|                | <b>b</b><br>(D6-React-<br>Test1&2)                       | Two-way ANOVA<br>(repeated<br>measures) | No effect of group                                         | F(1,13)=0.02206   | 0.8842 |
|                |                                                          |                                         | No effect of time                                          | F(3,39)=2.577     | 0.0675 |
|                |                                                          |                                         | No group x time interaction                                | F(3,39)=0.3770    | 0.7701 |
| <b>Fig S12</b> | <b>a</b>                                                 | Unpaired T-test                         |                                                            | T(20)=1.116       | 0.2778 |
|                | <b>b</b>                                                 | Unpaired T-test                         |                                                            | T(22)=1.139       | 0.2671 |
| <b>Fig S13</b> | <b>b</b><br>(D6-React-<br>Test) GFP vs<br>Gi-GFP         | Two-way ANOVA<br>(repeated<br>measures) | no effect of group                                         | F(1,15)=1.088     | 0.3134 |
|                |                                                          |                                         | no effect of time                                          | F(2,30)=2.341     | 0.1136 |
|                |                                                          |                                         | no group x time interaction                                | F(2,30)=0.02932   | 0.9711 |
|                | <b>c</b><br>(D6-React-<br>Test) GFP vs<br>Gi-GFP         | Two-way ANOVA<br>(repeated<br>measures) | no effect of group                                         | F(1,13)=1.896     | 0.1918 |
|                |                                                          |                                         | significant effect of time                                 | F(2,26)=3.908     | 0.0328 |
|                |                                                          |                                         | no group x time interaction                                | F(2,26)=0.3476    | 0.7096 |
| <b>d</b>       | One-way ANOVA                                            |                                         | F(2,13)=16,16                                              | 0.0003            |        |
| <b>Fig S14</b> | <b>a</b><br>(D6-React-<br>Test 1&2)<br>GFP vs Gi-<br>GFP | Two-way ANOVA<br>(repeated<br>measures) | no effect of group                                         | F(1,22)=0.1342    | 0.7176 |
|                |                                                          |                                         | Significant effect of time                                 | F(3,66)=2.922     | 0.0404 |
|                |                                                          |                                         | no group x time interaction                                | F(3,36)=0.4517    | 0.7170 |
|                |                                                          |                                         | no effect of group                                         | F(1,21)=0.01411   | 0.9066 |

|  |                                                          |                                         |                             |                |        |
|--|----------------------------------------------------------|-----------------------------------------|-----------------------------|----------------|--------|
|  | <b>b</b><br>(D6-React-<br>Test 1&2)<br>GFP vs Gi-<br>GFP | Two-way ANOVA<br>(repeated<br>measures) | significant effect of time  | F(3,63)=2.404  | 0.0758 |
|  |                                                          |                                         | no group x time interaction | F(3,63)=0.2366 | 0.8705 |

**Table S1:** Statistical analyses for each figure: From left to right : figure number, panel, statistical test used, effects analysed, F or T value for Anova or T test, value of probability (p) for significance.

|                           |                 |                                                 |
|---------------------------|-----------------|-------------------------------------------------|
| <i>PCR primers</i>        | Forward (5'-3') | TATATGGATCCATGTACCCATACGATGTTCCAGATTACGCTGCCAAC |
|                           | Reverse (5'-3') | TATATGGATCCCTACCTGGCAGTGCCGATGT                 |
| <i>Sequencing primers</i> | Forward (5'-3') | CCTTCTCCCTCTCCAGCCT                             |
|                           | Reverse (5'-3') | CTCAAGAGCCCACTAATGAAG                           |

Table S2: PCR primers used to clone HA-hM4D(G<sub>i</sub>) into CAG-IRES-GFP and primers used to sequence the resulting construct CAG-G<sub>i</sub>-IRES-GFP.
