# Supplementary material for: Adult-born neurons immature during learning are necessary for remote memory reconsolidation in rats
Source: PubMed Central journal article supplement (PMC7979763; doi:10.1038/s41467-021-22069-4), 2021-03-19
Supplement: 41467_2021_22069_MOESM3_ESM.pdf [file 41467_2021_22069_MOESM3_ESM.pdf]

## Reporting Summary

Nature Research wishes to improve the reproducibility of the work that we publish. This form provides structure for consistency and transparency in reporting. For further information on Nature Research policies, see [Authors & Referees](#) and the [Editorial Policy Checklist](#).

### Statistics

For all statistical analyses, confirm that the following items are present in the figure legend, table legend, main text, or Methods section.

n/a Confirmed

- |                                     |                                     |                                                                                                                                                                                                                                                            |
|-------------------------------------|-------------------------------------|------------------------------------------------------------------------------------------------------------------------------------------------------------------------------------------------------------------------------------------------------------|
| <input type="checkbox"/>            | <input checked="" type="checkbox"/> | The exact sample size ( $n$ ) for each experimental group/condition, given as a discrete number and unit of measurement                                                                                                                                    |
| <input checked="" type="checkbox"/> | <input type="checkbox"/>            | A statement on whether measurements were taken from distinct samples or whether the same sample was measured repeatedly                                                                                                                                    |
| <input type="checkbox"/>            | <input checked="" type="checkbox"/> | The statistical test(s) used AND whether they are one- or two-sided<br><i>Only common tests should be described solely by name; describe more complex techniques in the Methods section.</i>                                                               |
| <input checked="" type="checkbox"/> | <input type="checkbox"/>            | A description of all covariates tested                                                                                                                                                                                                                     |
| <input type="checkbox"/>            | <input checked="" type="checkbox"/> | A description of any assumptions or corrections, such as tests of normality and adjustment for multiple comparisons                                                                                                                                        |
| <input type="checkbox"/>            | <input checked="" type="checkbox"/> | A full description of the statistical parameters including central tendency (e.g. means) or other basic estimates (e.g. regression coefficient) AND variation (e.g. standard deviation) or associated estimates of uncertainty (e.g. confidence intervals) |
| <input type="checkbox"/>            | <input checked="" type="checkbox"/> | For null hypothesis testing, the test statistic (e.g. $F$ , $t$ , $r$ ) with confidence intervals, effect sizes, degrees of freedom and $P$ value noted<br><i>Give <math>P</math> values as exact values whenever suitable.</i>                            |
| <input checked="" type="checkbox"/> | <input type="checkbox"/>            | For Bayesian analysis, information on the choice of priors and Markov chain Monte Carlo settings                                                                                                                                                           |
| <input checked="" type="checkbox"/> | <input type="checkbox"/>            | For hierarchical and complex designs, identification of the appropriate level for tests and full reporting of outcomes                                                                                                                                     |
| <input checked="" type="checkbox"/> | <input type="checkbox"/>            | Estimates of effect sizes (e.g. Cohen's $d$ , Pearson's $r$ ), indicating how they were calculated                                                                                                                                                         |

*Our web collection on [statistics for biologists](#) contains articles on many of the points above.*

### Software and code

Policy information about [availability of computer code](#)

Data collection

Viewpoint tracking system (V 3,9,0,22) was used for water maze behavioral experiments, POLY file from Imetronic (V1) was used to study navigational strategy. Mercator software (Explora Nova, V4.0.0.0) was used for the measurement of Zif268 positive neurons. Clampfit software pClamp 10, Molecular devices, UK, V.10.7 was used for electrophysiological analyses

Data analysis

GraphPad Prism 6 and 8 were used to analyse data, generate graph and statistics

For manuscripts utilizing custom algorithms or software that are central to the research but not yet described in published literature, software must be made available to editors/reviewers. We strongly encourage code deposition in a community repository (e.g. GitHub). See the Nature Research [guidelines for submitting code & software](#) for further information.

### Data

Policy information about [availability of data](#)

All manuscripts must include a [data availability statement](#). This statement should provide the following information, where applicable:

- Accession codes, unique identifiers, or web links for publicly available datasets
- A list of figures that have associated raw data
- A description of any restrictions on data availability

The data that support the findings of this study are available in the source file

### Field-specific reporting

Please select the one below that is the best fit for your research. If you are not sure, read the appropriate sections before making your selection.

## Life sciences study design

All studies must disclose on these points even when the disclosure is negative.

|                 |                                                                                                                                                                                                                                                                                                                                                                     |
|-----------------|---------------------------------------------------------------------------------------------------------------------------------------------------------------------------------------------------------------------------------------------------------------------------------------------------------------------------------------------------------------------|
| Sample size     | No statistical methods were used to predetermine sample sizes. Over the 15 years of experience in using the water maze in rats we found that 8 rats per group is enough to reach statistical differences. To face the variability of the surgery, we increased the sample size to 10-12 rats per group. (Tronel et al, 2010, PNAS; Tronel et al, 2012, Hippocampus) |
| Data exclusions | Animals in which histological examination showed that cannulae or viral targeting were in the incorrect location were excluded from analysis after behavioural tests. The exclusion criteria was pre-established.                                                                                                                                                   |
| Replication     | Experiment on the effect of anisomycin on memory reconsolidation was replicated 3 times ( shown in Fig 1 and S2). Experiment on the effect of silencing immature neurons (Fig3) was replicated three time. All other experiment were replicated once. All attempts at replication were successful.                                                                  |
| Randomization   | All rats were assigned to different experimental conditions randomly                                                                                                                                                                                                                                                                                                |
| Blinding        | investigators were blind to group allocation in both behavioral experiments and cell counting.                                                                                                                                                                                                                                                                      |

## Reporting for specific materials, systems and methods

We require information from authors about some types of materials, experimental systems and methods used in many studies. Here, indicate whether each material, system or method listed is relevant to your study. If you are not sure if a list item applies to your research, read the appropriate section before selecting a response.

### Materials & experimental systems

| n/a                                 | Included in the study                                           |
|-------------------------------------|-----------------------------------------------------------------|
| <input type="checkbox"/>            | <input checked="" type="checkbox"/> Antibodies                  |
| <input type="checkbox"/>            | <input checked="" type="checkbox"/> Eukaryotic cell lines       |
| <input checked="" type="checkbox"/> | <input type="checkbox"/> Palaeontology                          |
| <input type="checkbox"/>            | <input checked="" type="checkbox"/> Animals and other organisms |
| <input checked="" type="checkbox"/> | <input type="checkbox"/> Human research participants            |
| <input checked="" type="checkbox"/> | <input type="checkbox"/> Clinical data                          |

### Methods

| n/a                                 | Included in the study                           |
|-------------------------------------|-------------------------------------------------|
| <input checked="" type="checkbox"/> | <input type="checkbox"/> ChIP-seq               |
| <input checked="" type="checkbox"/> | <input type="checkbox"/> Flow cytometry         |
| <input checked="" type="checkbox"/> | <input type="checkbox"/> MRI-based neuroimaging |

## Antibodies

### Antibodies used

GFP chicken primary antibody Abcam Cambridge #Ab 13970  
 BrdU Mouse primary antibody Dako Agilent, Santa Clara US #M0744  
 IdU Mouse primary antibody BD #347580  
 CldU rat primary antibody Accurate C&S CO #OBT0030  
 Zif 268 Rabbit primary antibody Santa Cruz Biotechnology #SC-189  
 Biotinylated goat anti chicken , Jackson Immunoresearch, #103-065-155  
 Horse anti mouse, Vector labs, Peterborough #BA-2001  
 Goat anti rat, Vector labs, Peterborough #BA-9400  
 Cy3goat anti rat , Jackson Immunoresearch, #112-165-062  
 Cy3goat anti mouse , Jackson Immunoresearch, 115-165-003  
 Alexa 488 goat anti rabbit , invitrogen #A11008  
 Cy5goat anti rabbit, Chemicon ## A10523  
 Dcx Rabbit primary antibody , Sigma # D 9818  
 BrdU Mouse primary Antibody, Accurate C&S CO #OBT0030  
 Calbindin goat primary antibody, Santa Cruz Biotechnology #SC7691

### Validation

GFP chicken primary antibody Abcam Cambridge #Ab 13970 validated for IHC : <https://www.abcam.com/gfp-antibody-ab13970.html>  
 BrdU Mouse primary antibody Dako Agilent, Santa Clara US #M0744: <https://www.agilent.com/cs/library/packageinsert/public/109731002.PDF>  
 IdU Mouse primary antibody BD #347580: <https://www.citeab.com/antibodies/2414712-347580-purified-mouse-anti-brdu>  
 CldU and BrdU rat primary antibody Accurate C&S CO #OBT0030: <https://www.bio-rad-antibodies.com/monoclonal/brdu-antibody-bu20a-mca2483.html?f=purified>  
 Zif 268 Rabbit primary antibody Santa Cruz Biotechnology #SC-189: <https://www.citeab.com/antibodies/790874-sc-189-egr-1->

antibody-c-19  
 Biotinylated goat anti chicken , Jackson Immunoresearch, #103-065-155: <https://www.citeab.com/antibodies/2035704-103-065-155-biotin-sp-affinipure-goat-anti-chicken-i>  
 Horse anti mouse, Vector labs, Peterborough #BA-2001: <https://www.citeab.com/antibodies/3379372-ba-2001-biotinylated-horse-anti-mouse-igg-antibody>  
 Goat anti rat, Vector labs, Peterborough #BA-9400, <https://vectorlabs.com/biotinylated-goat-anti-rat-igg-antibody.html>  
 Cy3goat anti rat , Jackson Immunoresearch, #112-165-062, <https://www.jacksonimmuno.com/catalog/products/112-165-062>  
 Cy3goat anti mouse , Jackson Immunoresearch, 115-165-003, <https://www.jacksonimmuno.com/catalog/products/115-165-003>  
 Alexa 488 goat anti rabbit , invitrogen #A11008, <https://www.thermofisher.com/antibody/product/Goat-anti-Rabbit-IgG-H-L-Cross-Adsorbed-Secondary-Antibody-Polyclonal/A-11008>  
 A647 Donkey anti Goat, Jackson Immunoresearch, #705-605-147, <https://www.jacksonimmuno.com/catalog/products/705-605-147>  
 Cy5goat anti rabbit, Chemicon ## A10523, <https://www.fishersci.com/shop/products/anti-rabbit-igg-h-l-cy-5-conjugated-polyclonal-thermo-scientific-novex/A10523>  
 Dcx Rabbit primary antibody , Sigma # D9818, <https://www.sigmaaldrich.com/catalog/product/sigma/d9818?lang=fr&region=FR>  
 Calbindin goat primary antibody , Santa Cruz Biotechnology #SC7691, <https://www.scbt.com/fr/p/calbindin-d28k-antibody-c-20?requestFrom=search>

## Eukaryotic cell lines

Policy information about [cell lines](#)

|                                                                   |                                                                |
|-------------------------------------------------------------------|----------------------------------------------------------------|
| Cell line source(s)                                               | The 293GPG cell line was provided by Dr Dieter Chichung Lie    |
| Authentication                                                    | The 293GPG cell line was generated by Ory DS et al . PNAS 1996 |
| Mycoplasma contamination                                          | cell lines were tested negative for mycoplasma contamination   |
| Commonly misidentified lines (See <a href="#">ICLAC</a> register) | N/A                                                            |

## Animals and other organisms

Policy information about [studies involving animals](#); [ARRIVE guidelines](#) recommended for reporting animal research

|                         |                                                                                                                                                                                                            |
|-------------------------|------------------------------------------------------------------------------------------------------------------------------------------------------------------------------------------------------------|
| Laboratory animals      | All rats were Sprague Dawleys OFA from Charles River. Male were delivered at 2 month-old at the beginning of the experiments. Ten Pregnant females were delived at the age of 3 month-old.                 |
| Wild animals            | This study did not involve wild animals.                                                                                                                                                                   |
| Field-collected samples | This study did not involve samples collected from the field.                                                                                                                                               |
| Ethics oversight        | all experiments were performed in accordance with the recommendations of the European Union (2010/63/UE) and were approved by the ethical committee of the Unversity of Bordeaux (#Dir 1367 and #DIR23375) |

Note that full information on the approval of the study protocol must also be provided in the manuscript.
